# Supplementary material for: Synthesis of CuO–CdS composite nanowires and their ultrasensitive ethanol sensing properties
Source: Royal Society of Chemistry journal article supplement (doi:10.1039/c8qi00951a), 2018-12-03
Supplement: c8qi00951a1.pdf [file c8qi00951a1.pdf]

## Supporting Information

### **Synthesis of CuO-CdS composite nanowires and its ultrasensitive ethanol sensing property**

Nan Zhang<sup>a,1</sup>, Xiaohui Ma<sup>a,1</sup>, Yanyang Yin<sup>a</sup>, Yu Chen<sup>a, b</sup>, Chuannan Li<sup>a</sup>, Jingzhi Yin<sup>a,\*</sup>, Shengping Ruan<sup>a,\*</sup>

<sup>a</sup> State Key Laboratory on Integrated Optoelectronics and College of Electronic Science and Engineering, Jilin University, Changchun 130012, P. R. China.

<sup>b</sup> Institute of Semiconductors, Chinese Academy of Sciences, Beijing 100083, PR China.

E-mail: Ruansp@jlu.edu.cn (S. Ruan)

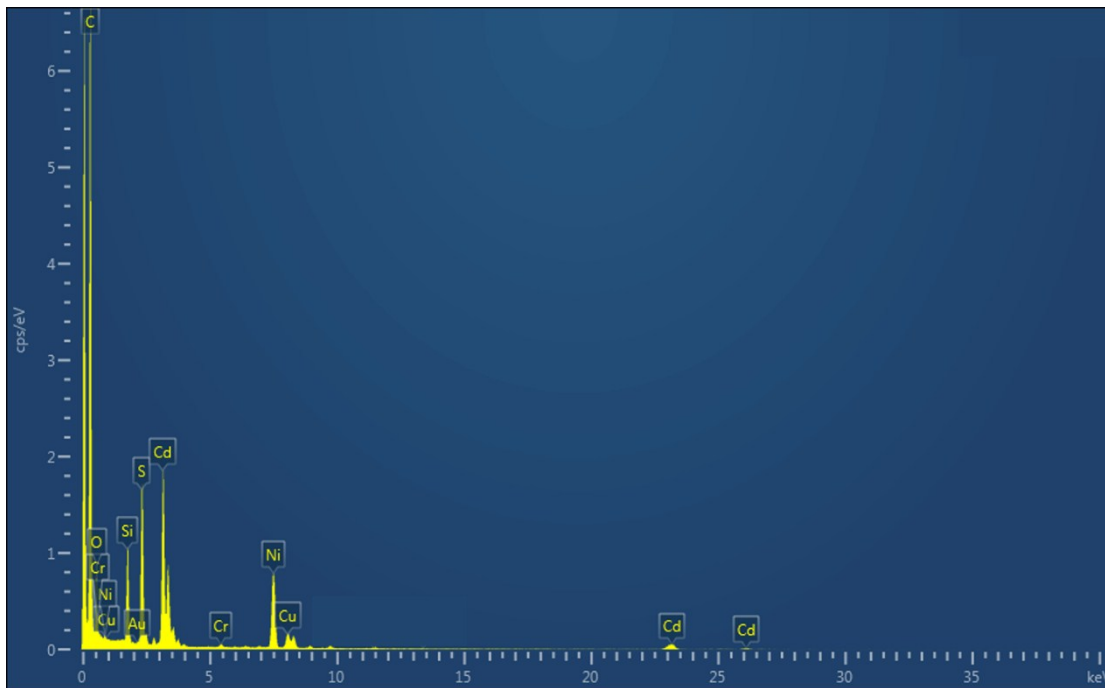

Figure S1. EDS elemental spectrum of the 0.05 at% CuO-CdS nanowires.

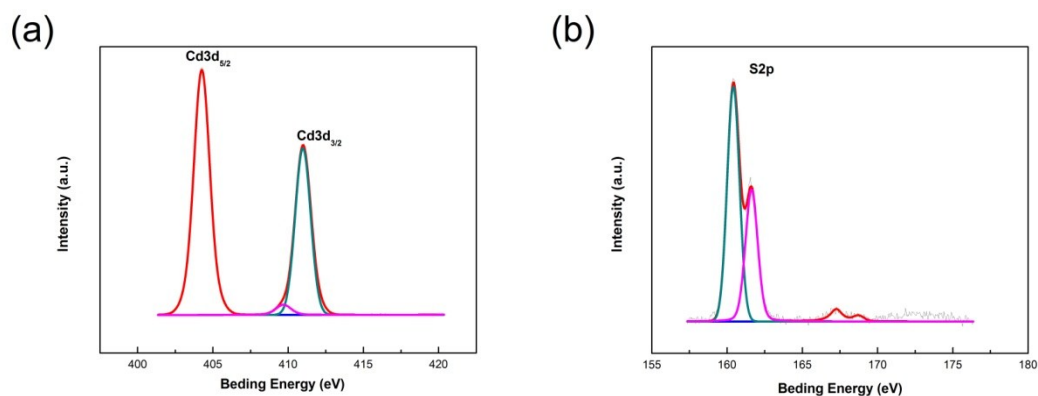

Figure S2. the XPS spectra of the CdS: (a) Cd element, (b) S element

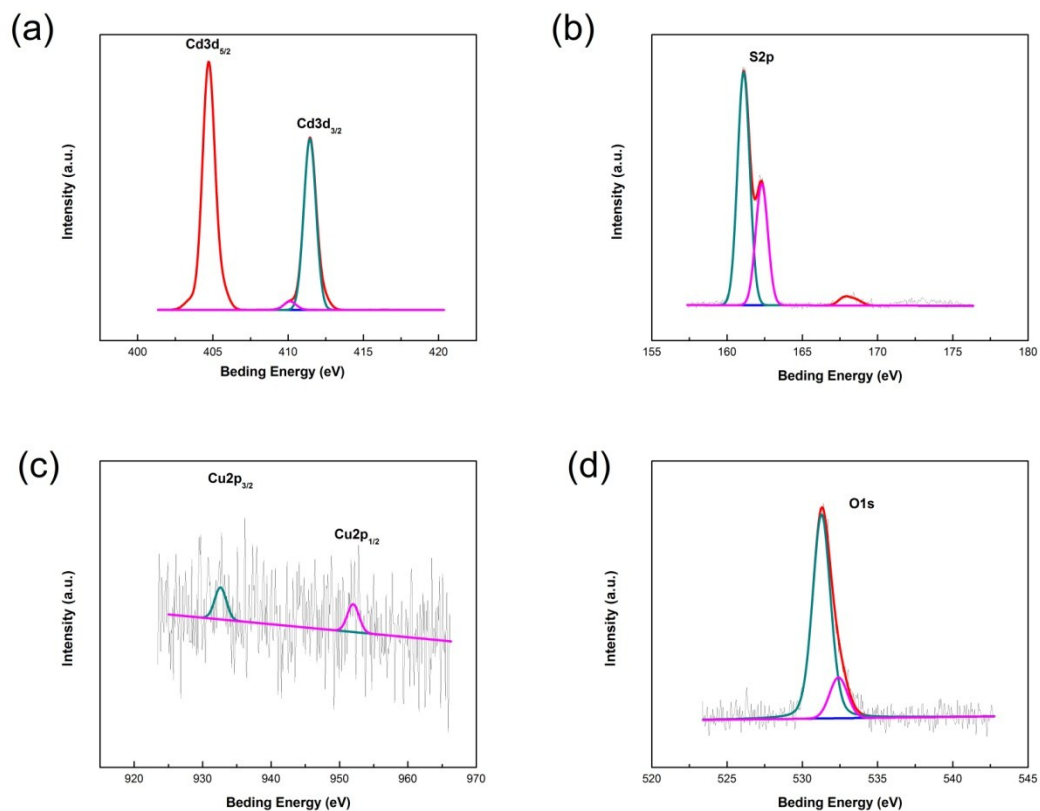

**Figure S3.** the XPS spectra of the 0.01 at% CuO-CdS: (a) Cd element, (b) S element, (c) Cu element and (d) O element.

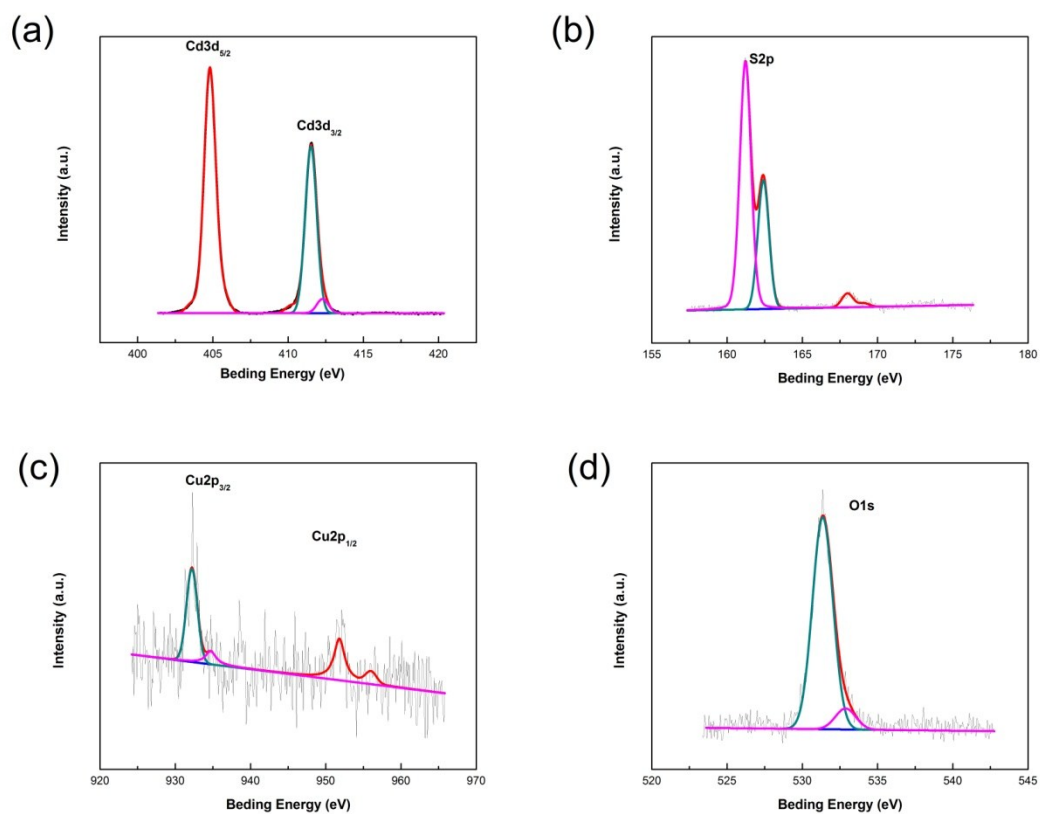

**Figure S4.** the XPS spectra of the 0.05 at% CuO-CdS: (a) Cd element, (b) S element, (c) Cu element and (d) O element.

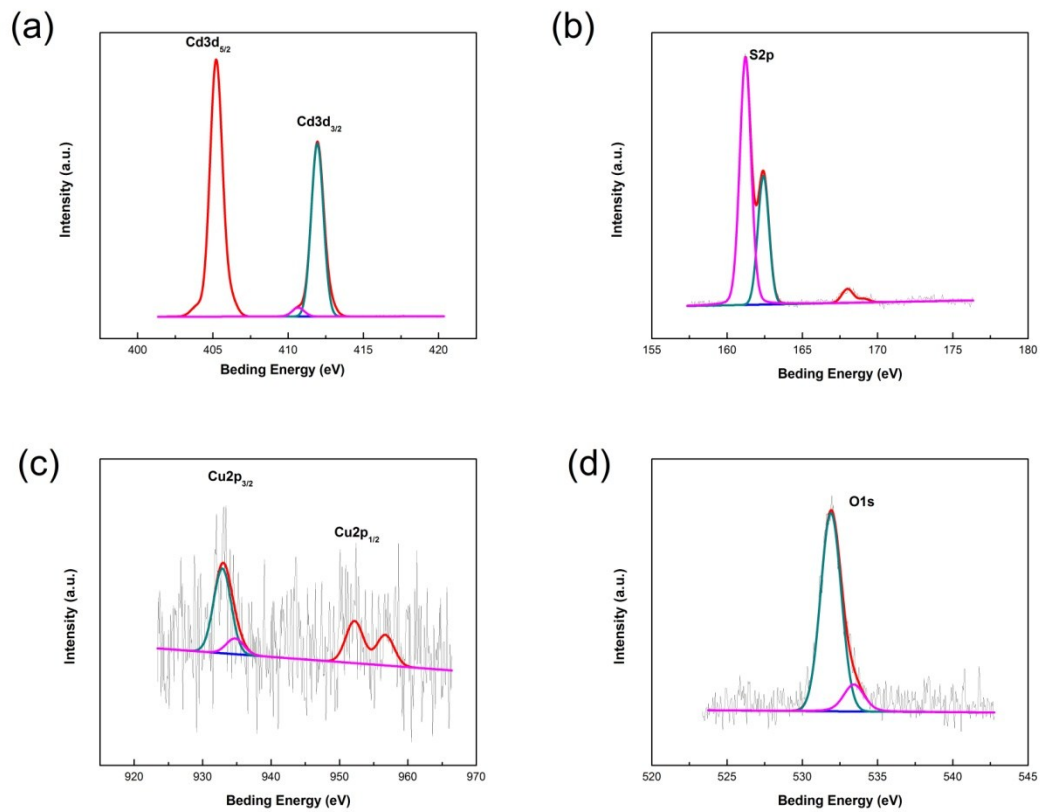

**Figure S5.** the XPS spectra of the 0.1 at% CuO-CdS: (a) Cd element, (b) S element, (c) Cu element and (d) O element.

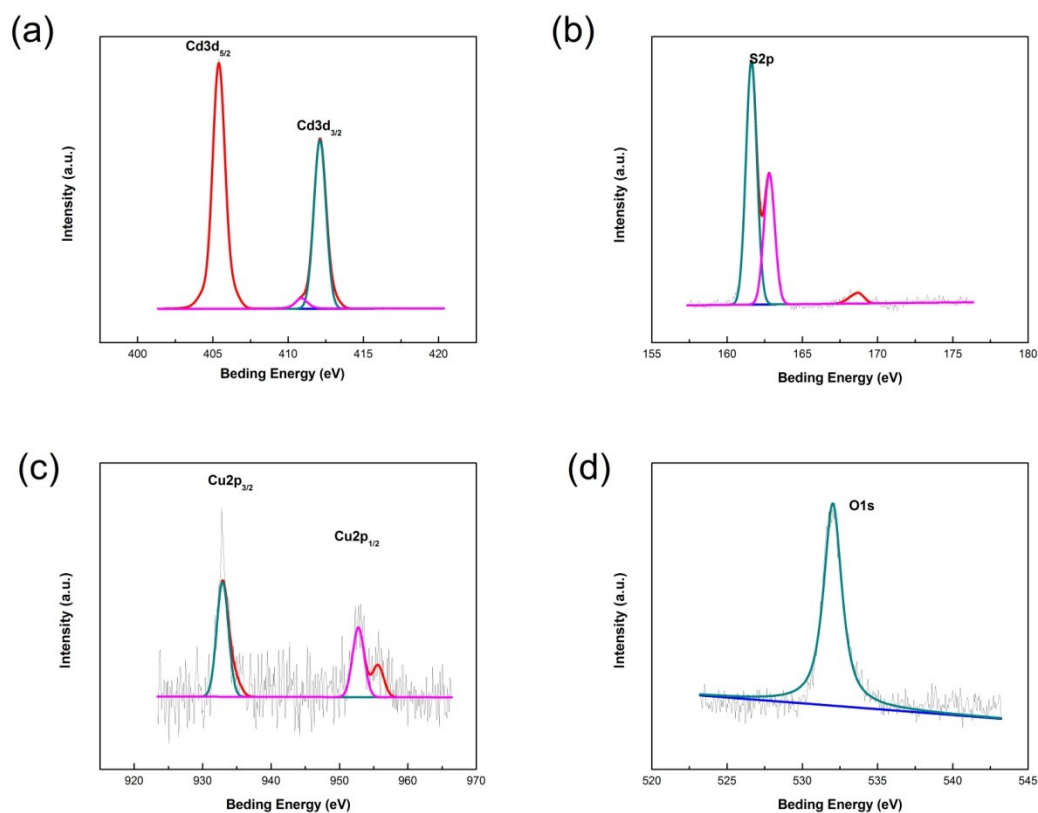

**Figure S6.** the XPS spectra of the 0.5 at% CuO-CdS: (a) Cd element, (b) S element, (c) Cu element and (d) O element.

**Table S1** atom ratio of Cu to Cd of the as-prepared samples according to XPS

| Samples             | Pure CdS | 0.01 at%<br>CuO-CdS | 0.05 at%<br>CuO-CdS | 0.1 at%<br>CuO-CdS | 0.5 at%<br>CuO-CdS |
|---------------------|----------|---------------------|---------------------|--------------------|--------------------|
| Atom ratio<br>Cu/Cd | 0        | 0.2 %               | 0.75 %              | 0.84 %             | 1.38 %             |

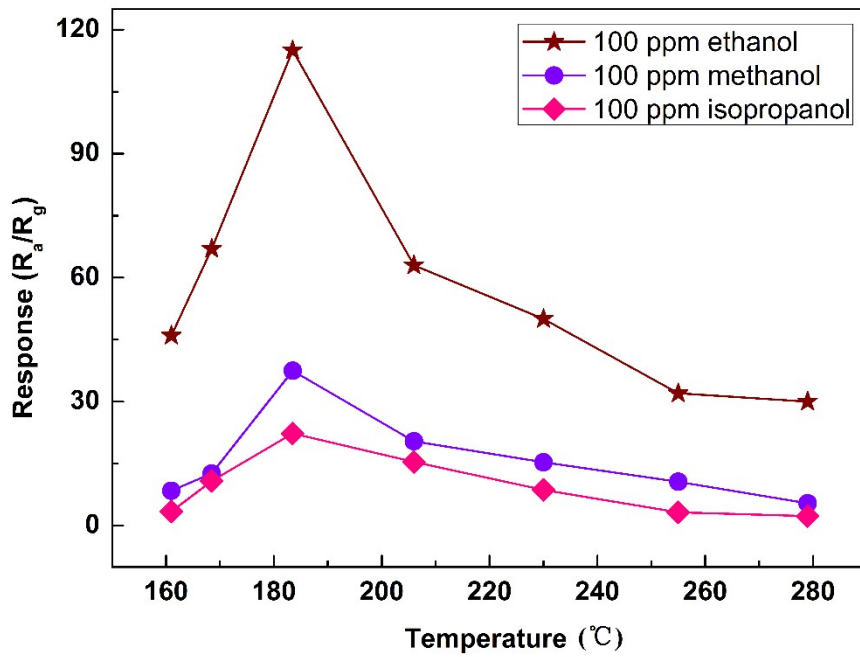

Figure S6. Response of 0.05% CuO/CdS composite based sensor to 100 ppm ethanol, isopropanol and methanol at different operating temperature.

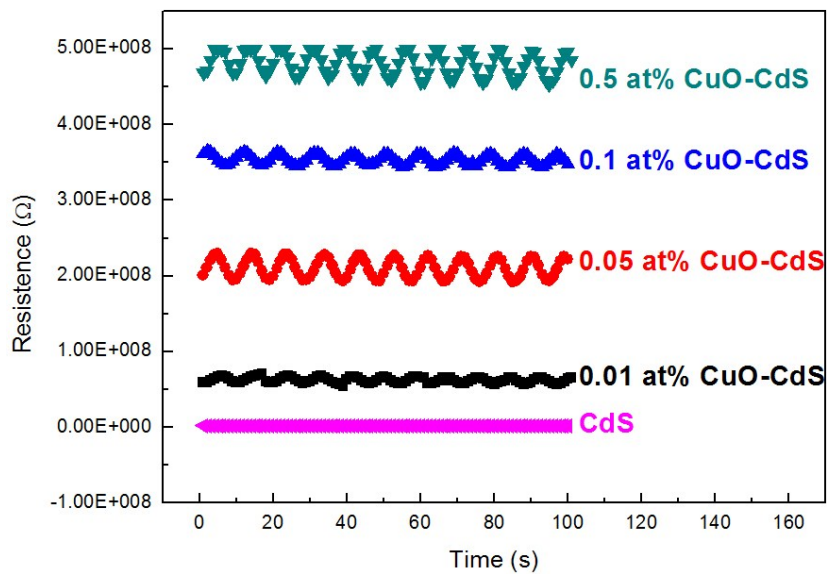

Figure S7. The change in sensor resistance in air around 185°C with the additive amounts of CuO.
